# Estimating social contact rates for the COVID-19 pandemic using Google mobility and pre-pandemic contact surveys

Authors: Em Prestige<sup>1\*</sup>, Pietro Coletti<sup>2</sup>, Jantien Backer<sup>3</sup>, Nicholas G. Davies<sup>1</sup>, W. John Edmunds<sup>1</sup>, Christopher I. Jarvis<sup>1</sup>

1. Centre for Mathematical Modelling of Infectious Diseases, London School of Hygiene & Tropical Medicine, United Kingdom
2. Data Science Institute, I-BioStat, Hasselt University, Hasselt, Belgium
3. National Institute for Public Health and the Environment (RIVM), Bilthoven, The Netherlands

*\*Corresponding author*

E-mail: [em.prestige@lshtm.ac.uk](mailto:em.prestige@lshtm.ac.uk)

Short title: Using Google mobility to estimate social contact rates for the COVID-19 pandemic

Keywords: social mobility data; social contact rates; COVID-19 pandemic; prediction methods

## Funding statement:

This research was conducted as part of the first authors (Em Prestige) pre-doctoral fellowship funding by the National Institute for Health and Care Research (NIHR); grant number: [NIHR301994](#). Funders did not play any role in the study design, data collection and analysis, decision to publish, or preparation of the manuscript.

## Abstract

During the COVID-19 pandemic, aggregated mobility data was frequently used to estimate changing social contact rates. By taking pre-pandemic contact matrices, and transforming these using pandemic-era mobility data, infectious disease modellers attempted to predict the effect of large-scale behavioural changes on contact rates. This study explores the most accurate method for this transformation, using pandemic-era contact surveys as ground truth. We compared four methods for scaling synthetic contact matrices: two using fitted regression models and two using “naïve” mobility or mobility squared models. The regression models were fitted using the CoMix contact survey and Google mobility data from the UK over March 2020 – March 2021. The four models were then used to scale synthetic contact matrices—a representation of pre-pandemic behaviour—using mobility data from the UK, Belgium and the Netherlands to predict the number of contacts expected in “work” and “other” settings for a given mobility level. We then compared partial reproduction numbers estimated from the four models with those calculated directly from CoMix contact matrices across the three countries. The accuracy of each model was assessed using root mean squared error. The fitted regression models had substantially more accurate predictions than the naïve models, even when models were applied to out-of-sample data from the UK, Belgium and the Netherlands. Across all countries investigated, the linear fitted regression model was the most accurate and the naïve model using mobility alone was the least accurate. When attempting to estimate social contact rates during a pandemic without the resources available to conduct contact surveys, using a model fitted to data from another pandemic context is likely to be an improvement over using a “naïve” model based on mobility data alone. If a naïve model is to be used, mobility squared may be a better predictor of contact rates than mobility per se.

## 1. Introduction

The COVID-19 pandemic caused extraordinary changes in social behaviour. Individuals reduced their social contact both spontaneously in response to perceived risk and following the imposition of physical distancing measures and restrictions on movement. The need to estimate the effect of these behavioural changes on viral transmission motivated the deployment of large-scale contact surveys and the collection of aggregated mobility data across the world.

Contact surveys measure the rates at which people come into physical or conversational contact with others, typically over a 24-hour period. One such survey was the CoMix survey (1) which began in the UK (2), Belgium (3) and the Netherlands (4) in 2020 and collected data from multiple countries in Europe throughout the pandemic (5). Contact surveys can be used to parameterise infectious disease models which take social contact rates as an input (6,7). However, they are expensive and difficult to undertake, so data was collected only in a limited number of countries. In early 2020, several companies started to release aggregated “mobility” data with the stated aim of helping public health professionals to understand behavioural change in response to the pandemic, as mobility is considered a valid proxy of risk behaviour (8). Usually, this mobility data quantified the time spent in different locations by mobile phone users, was made freely available, and covered participants in nearly all countries. These advantages led to the heavy use of mobility data during the pandemic to assess the impact of social distancing measures and to parameterise mathematical models, with Google’s “Community Mobility Reports” (9) being particularly widely used (10–13). However, as the use of mobility data as a proxy for social contact rates has not been formally assessed, it remains unclear how precisely to transform relative changes in mobility in different locations into changes in contact rates, and how well such transformations predict measured contact rates.

In this study, we explore methods for using aggregated mobility data to estimate social contact rates during a pandemic. Each method starts with a synthetic contact matrix that captures age-specific rates of social mixing in a pre-pandemic context, and scales the matrix using time-varying mobility data. We compare four methods for scaling synthetic contact matrices, two using fitted regression models with UK data and two using “naïve” mobility or mobility squared models, and determine which method best approximates empirical contact matrices collected in the CoMix study for out-of-sample data for the UK, Belgium, and the Netherlands. Our study helps inform modelling approaches where mobility data is used as a proxy for social contact behaviour and detailed social contact surveys are not available.

## 2. Materials and Methods

In this study, we visually compare trends in mean contacts recorded in the CoMix social contact survey with Google mobility data, and formally assess the performance of different methods used to relate mobility to social contacts. Specifically, we investigated the relationship between specific Google mobility indicators and corresponding contact types from the CoMix dataset for the UK, and developed a series of statistical and mechanistic

models to relate the data to one another. We then used these models to estimate contact rates from mobility data for the UK, Belgium, and the Netherlands, in order to estimate the predictive accuracy of each model. Our results serve as a tool for epidemiologists and infectious disease modellers to understand better how mobility data might relate to contact rates in a population.

## 2.1 Study Design

The study design and method of informed consent for the CoMix study were approved by the Ethics Committee of the London School of Hygiene and Tropical Medicine (reference number 21795) in the UK and by the Ethics Committee of Antwerp University Hospital (reference 3236 - BUN B3002020000054) in Belgium. Need for approval was waived by the Medical Research Ethics Committee NedMec in the Netherlands (research protocol number 22/917). New approvals for use of all CoMix data, for the UK, Belgium and the Netherlands, was not necessary as secondary analyses were covered in the original approvals. All analyses were carried out on anonymised participant data. Additionally, Google mobility data was obtained from a publicly available source (9).

### *2.1.1 Mobility data*

Google's Community Mobility Reports data uses the median value from a 5-week baseline period of 02/01/2020 to 06/02/2020 to compare changes in the number of visits to specific services/areas. The raw data is expressed as a percentage change relative to the baseline, e.g. -50% for half as many daily visits as during the baseline period and +100% for twice as many daily visits as during the baseline period. We transformed this to a scale which expresses the change from baseline as a multiple, e.g. 0.5 for half as many visits as compared to baseline and 2 for twice as many visits as compared to baseline. We included the Google mobility indicators for "retail and recreation", "grocery and pharmacy", "transit stations", and "workplaces" in our analyses. Data is available between 23/03/2020 to 13/10/2022. We were unable to find clear information in regard to how Google classified visits into the preceding categories (14).

### *2.1.2 Survey data*

The CoMix survey collected information on contacts weekly in the UK from 23/03/2020 to 01/03/2022 (1). The present study includes weekly survey results for the entire study period for the visual comparisons between CoMix data and mobility indicators and for the descriptive statistics of survey participants; subsequent statistical models were created using CoMix and mobility data for the UK limited to between 23/03/2020 to 31/03/2021 as correlations between mean contact numbers and mobility became weaker in the second year (see supplementary Table S5.1). Adult panels at first contained 1500 participants, and increased to include 2500 participants from August 2020. Participants from each panel were surveyed once every 2 weeks, with panels alternating so that each week was covered. Ipsos MORI used quota sampling, for age, gender, and region, to recruit a representative sample of the UK (15). The survey followed the design of the 2005/2006 POLYMOD survey (16) with some additional questions. More details on the CoMix survey can be found in Gimma et al.

and Jarvis et al. (2,15). CoMix data for out-of-sample tests of the regression model, UK (01/04/2021-01/03/2022); Belgium (16/04/2020-01/04/2021); the Netherlands (16/04/2020-01/04/2021), are detailed elsewhere (17–19). Survey participants were asked to report the number of people they met on the day prior to the survey in various settings. Participants had the option of recording any of their contacts in one of two ways: either individually (i.e. reporting details about contact made with one individual), or as mass contacts (i.e. reporting a summary of contact made with a group of several people). We processed these two contact types differently, as detailed below.

Traditionally, social contact surveys report aggregated contact data as contacts having occurred at “home”, “work”, “school” or “other” settings; the CoMix data was also processed to reflect this usual categorisation. We chose to focus on “work” and “other” contacts, as Google mobility does not capture changes in school contacts and residential mobility is measured in such a way that does not allow for comparison to home contacts, i.e. it measures time spent in the home, as opposed to number of visits to homes. Additionally, it is more likely that household contacts are related more closely to household size than the number of visits.

## 2.2 Data Preparation

We included participants aged 18 and over, as children’s contacts were reported by their parents, but did not restrict contact ages. As per previous CoMix analyses (15), we excluded survey rounds six and seven because of data collection issues due to an ad-hoc change to the questionnaire resulting in fewer contacts reported for those weeks. When making predictions for out-of-sample data, we include only the first year of data available to Belgium and the Netherlands due to availability of validated data. The second year of UK data was validated and available, hence this was used as another out-of-sample data source.

To average out differences in behaviour between alternating panels, we averaged daily “work” and “other” contacts over a two-week moving window. We reweighted the sample based on age and social class (see supplementary material for visualisations of how survey participants’ characteristics changed over time, Figures S1-S3). This was to ensure that changes in the recruitment process over the course of the survey did not influence the investigation, and to improve the generalizability of the study. We also reweighted the sample so that contacts made on weekends comprised 2/7ths of the total sampling weight. This was done as slightly fewer than 2/7ths (25%) of observations were on a Saturday or Sunday and the number of contacts on these days was generally lower.

Occasionally, some participants reported mass contacts in extremely high numbers, such as 3000 and higher. These occasional large mass-contact events introduced substantial noise into our estimates of the mean contact rate over time. To stabilise these estimates, mass contacts were capped at 50 contacts per participant, per date, for each contact type, resulting in the reduction of 6% in the total number of “work” contacts and of 7% in the total number of “other” contacts. We capped contacts by randomly sampling 50 contacts in each contact type for each participant for each date, when the contacts were listed as

'mass'. Less than 1% of participants had their "work" contacts capped and less than 0.5% of participants had their "other" contacts capped. Other analyses performed on this data implemented a similar approach and hence for consistency it was applied to this investigation (15).

## 2.3 Statistical Analysis

R version 4.2.1 was used for all analyses (20); code and data are available through Github and Zenodo (see Data Availability Statement). We conducted two broad analyses: visually comparing Google mobility to contact rates, and investigating ways to use Google mobility data to scale pre-pandemic contact rates. Through the second analysis we used four methods to scale contacts, comparing methods using Google mobility alone (naïve models) and methods built using CoMix data and Google mobility data.

### *2.3.1 Comparing Mobility Indicators to Contacts*

We first visually compared the mobility indicators to the relevant contacts (see section 3.2.1): "work" contacts were compared against the "workplaces" mobility indicator and "other" contacts against a composite "other" mobility indicator which we calculated as the mean of the "retail and recreation", "transit stations", and "grocery and pharmacy" mobility indicators. Here we looked at whether contact rates rose at similar time points as when mobility indicators increased. We also looked at whether restriction periods had similar impacts on both contact rates and Google mobility indicators.

### *2.3.2 Creating Relative Contact Rates*

The aim of this investigation is to determine how to use Google mobility as a proxy for social contact rates during a pandemic, specifically by comparing four different models – two "naïve" models and two regression models (see section S.1 in supplementary material) – relating mobility to relative contact rates. The two naïve models are commonly encountered in the literature (11–13), while the regression approach is less commonly used (21) and the specific regression models we analyse are fitted in this paper.

The two "naïve" models are based on first principles, namely that contacts are either directly proportional to mobility ("mobility" model) or to mobility squared ("mobility squared" model). The "mobility" model assumes that given a visit is made to a particular type of venue, a person makes the same number of contacts. An example of this would be going on a date: the amount of social contact you might have during a date may not strongly depend upon how many other people are going on dates. The "mobility squared" model assumes that, given a visit is made to a particular type of venue, the number of contacts depends upon the number of other people making visits to the same type of venue. An example of this might be using public transport, where your risk might depend upon how many other people are using public transport. In other words, the "mobility" model assumes that contacts are made through coordinated activities, and the "mobility squared" model assumes that contacts are made at random with other people at the same venues. Both the "mobility" (11) and "mobility squared" (12,13) models have been used in

pandemic-era modelling studies. For each of the naïve models, a mobility value of 1 corresponds to a relative contact rate of 1, and either the mobility value or the mobility value squared is used directly as the relative contact rate. The relative contact rate is then multiplied by the pre-pandemic contact matrix measured for a given setting to produce an estimate of the during-pandemic contact matrix.

The two regression models were fitted to contact rates for the UK as measured by CoMix, with Google mobility as the independent variable. We contrasted two regression models, one with an intercept and linear term (the “linear model”) and one with an intercept, a linear term, and a quadratic term (the “quadratic model”). Like the naïve models, the regression models produce an estimate of relative contact rates from an input of mobility, which are then used as a multiplicative factor on a pre-pandemic “baseline” contact matrix, to yield a contact matrix. The pre-pandemic “baseline” was provided by estimates for the UK as measured by the 2006 POLYMOD survey (16) - see supplementary material for a more detailed description. The naïve models were each fitted separately to “work” contacts from CoMix, using Google mobility “workplace” visits as the predictor, and to “other” contacts from CoMix, using the composite Google mobility “other” visits measure as the predictor, for the UK. Confidence intervals were calculated using the `confint` R command (22).

The four models obtained above were used to predict relative contact rates from Google mobility data for the UK, Belgium, and the Netherlands. To assess the performance of the four models in the context of methods people may use during an emergency when there is no contact data available, we used synthetic contact matrices (23). These matrices are available for 177 countries and therefore can be used in the majority of the countries of the world. We scaled the synthetic matrices by the relative contact rates yielded by each model. We assumed that the estimated relative contact rate we have estimated for adults can be extended to children without adjustment.

From the scaled synthetic matrices, we then calculated the dominant eigenvalues for each fortnight in the study period. In order to translate these results into something understandable, we transformed the dominant eigenvalues into “partial” reproduction numbers. This was done by comparing early (07/03/2020-13/03/2020) estimates of  $R_t$  (number of secondary infections generated by one infected person) from the EpiForecast work (24) and the dominant eigenvalue for the synthetic matrix for ‘all’ contacts for the UK (23). This gave us a multiplicative factor to use to transform the dominant eigenvalues we calculated, into partial reproduction numbers. This multiplicative factor was calculated as follows:

$$\text{multiplicative factor} = \frac{R_t \text{ average}}{\text{dominant eigenvalue}}.$$

This transformation is done to put our results on a comprehensible scale, but note that in general it is not the case that partial reproduction numbers calculated in this fashion will sum to the overall reproduction number.

The “partial reproduction number” can be expressed through the following equation:

$$\text{multiplicative factor} \times \text{dominant eigenvalue}(\text{contact scaling factor} \times \text{synthetic matrix})$$

We assess the accuracy of the four models in predicting partial reproduction numbers both visually (Figures 4-6) and quantitatively (Tables S6-S11), in the latter case using root mean squared error. As a ‘true’ value for the partial reproduction numbers we calculated the partial reproduction number for the CoMix contact matrices for the respective contact type and country.

### 2.3.3 Work Flow Diagram

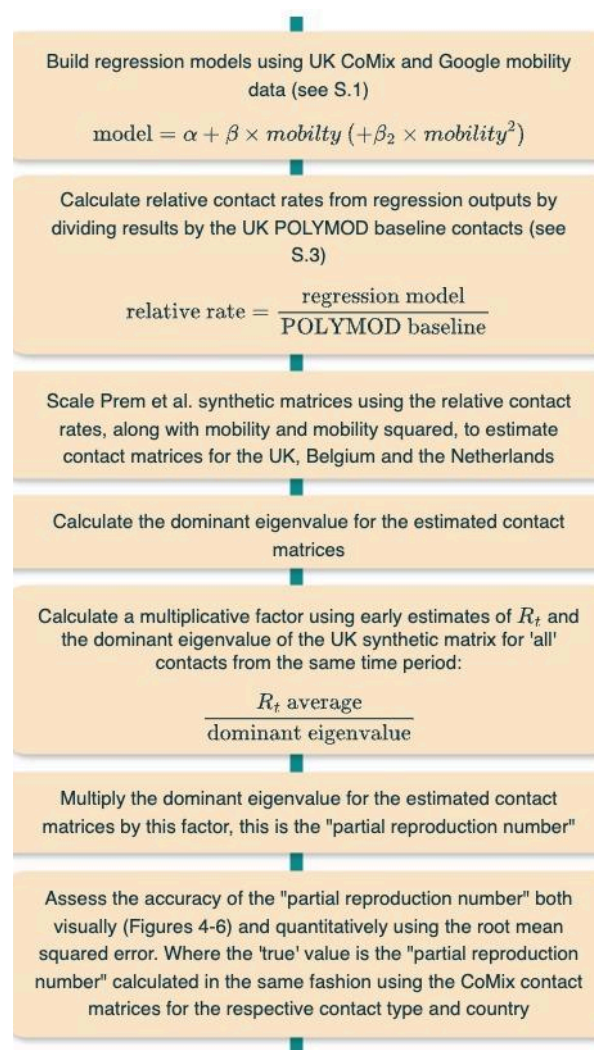

Figure 1: work flow diagram describing process of comparing regression based and naïve models

Figure 1 shows the process in which data was used throughout the investigation and how each step relates to each other. This aims to clarify how the data sources (CoMix, POLYMOD, Google Mobility) relate to one another.

### 3. Results

#### 3.1 Descriptive Analysis

For the UK there were 121,057 surveys completed in the study period, filled out by 17,497 participants. Characteristics of both the surveys completed and the individual participants are provided in Table 1. As participants were surveyed multiple times, characteristic distributions are slightly different between participants and observations.

| <i>Characteristic</i>      | <i>Number of Participants (%)</i> | <i>Number of Observations (%)</i> | <i>Population Proportion %</i> |
|----------------------------|-----------------------------------|-----------------------------------|--------------------------------|
| <i>Gender</i>              |                                   |                                   |                                |
| Female                     | 8,591 (49.1)                      | 49,826 (50.8)                     | 50.75                          |
| Male                       | 7,832 (44.8)                      | 45,367 (46.3)                     | 48.75                          |
| Other                      | 48 (0.3)                          | 259 (0.3)                         | 0.5                            |
| Missing                    | 1,026 (5.9)                       | 2,629 (2.7)                       | -                              |
| <i>Age-group</i>           |                                   |                                   |                                |
| 18-29                      | 3,039 (17.4)                      | 12,552 (12.8)                     | 18.8                           |
| 30-39                      | 3,035 (17.3)                      | 15,401 (15.7)                     | 17.2                           |
| 40-49                      | 2,883 (16.5)                      | 16,279 (16.6)                     | 16                             |
| 50-59                      | 3,206 (18.3)                      | 19,396 (19.8)                     | 17.3                           |
| 60-69                      | 3,213 (18.4)                      | 20,691 (21.1)                     | 13.6                           |
| 70+                        | 2,121 (12.1)                      | 13,762 (14.0)                     | 17.2                           |
| <i>Employment Status</i>   |                                   |                                   |                                |
| Employed                   | 7,508 (42.9)                      | 44,007 (44.9)                     | 45.5                           |
| Unemployed                 | 9,989 (57.1)                      | 54,074 (55.1)                     | 54.5                           |
| <i>Social Class</i>        |                                   |                                   |                                |
| A - upper middle class     | 806 (4.6)                         | 4,554 (4.6)                       | 4                              |
| B - middle class           | 4,638 (26.5)                      | 25,820 (26.3)                     | 23                             |
| C1 - lower middle class    | 5,626 (32.2)                      | 32,450 (33.1)                     | 29                             |
| C2 - skilled working class | 2,889 (16.5)                      | 15,561 (15.9)                     | 21                             |

|                                |              |               |    |
|--------------------------------|--------------|---------------|----|
| D - working class              | 2,479 (14.2) | 14,100 (14.4) | 15 |
| E - lower level of subsistence | 1,059 (6.1)  | 5,596 (5.7)   | 8  |
| <i>Area</i>                    |              |               |    |
| East Midlands                  | 1,350 (7.7)  | 7,634 (7.8)   | 7  |
| East of England                | 1,664 (9.5)  | 9,504 (9.7)   | 9  |
| Greater London                 | 2,248 (12.8) | 12,889 (13.1) | 13 |
| North East                     | 757 (4.3)    | 4,267 (4.4)   | 4  |
| North West                     | 1,205 (6.9)  | 6,571 (6.7)   | 11 |
| Northern Ireland               | 473 (2.7)    | 2,410 (2.5)   | 3  |
| Scotland                       | 1,592 (9.1)  | 8,799 (9.0)   | 8  |
| South East                     | 2,510 (14.3) | 13,875 (14.1) | 14 |
| South West                     | 1,632 (9.3)  | 9,259 (9.4)   | 9  |
| Wales                          | 922 (5.3)    | 4,939 (5.0)   | 5  |
| West Midlands                  | 1,625 (9.3)  | 9,165 (9.3)   | 9  |
| Yorkshire and The Humber       | 1,519 (8.7)  | 8,769 (8.9)   | 8  |
| <i>Household size group</i>    |              |               |    |
| 1                              | 3,712 (21.2) | 23,211 (23.7) | 30 |
| 2                              | 7,152 (40.9) | 42,874 (43.7) | 35 |
| 3-5                            | 6,276 (35.9) | 30,629 (31.2) | 30 |
| 6+                             | 357 (2)      | 1,367 (1.4)   | 5  |

Table 1: Participant characteristic summary for participants included in regression models; an observation is a complete survey response; percentages rounds to 1 decimal place so may not add to 100. Most population proportions were from the 2021 census (25) aside from social class which comes from a 2008 IPSOS social class report (26).

Table 1 shows that overall, characteristics were broadly representative of the British population. Males were slightly underrepresented in the survey. There was also a slightly larger proportion of middle class and lower middle class participants and a slightly smaller proportion of skilled working class and working class participants compared to the population distribution. In age distribution, 60–69-year-olds were relatively overrepresented and individuals aged 70 and up were relatively underrepresented in the survey. We reweighted the sample based on participant age and social class to adjust for the most important differences.

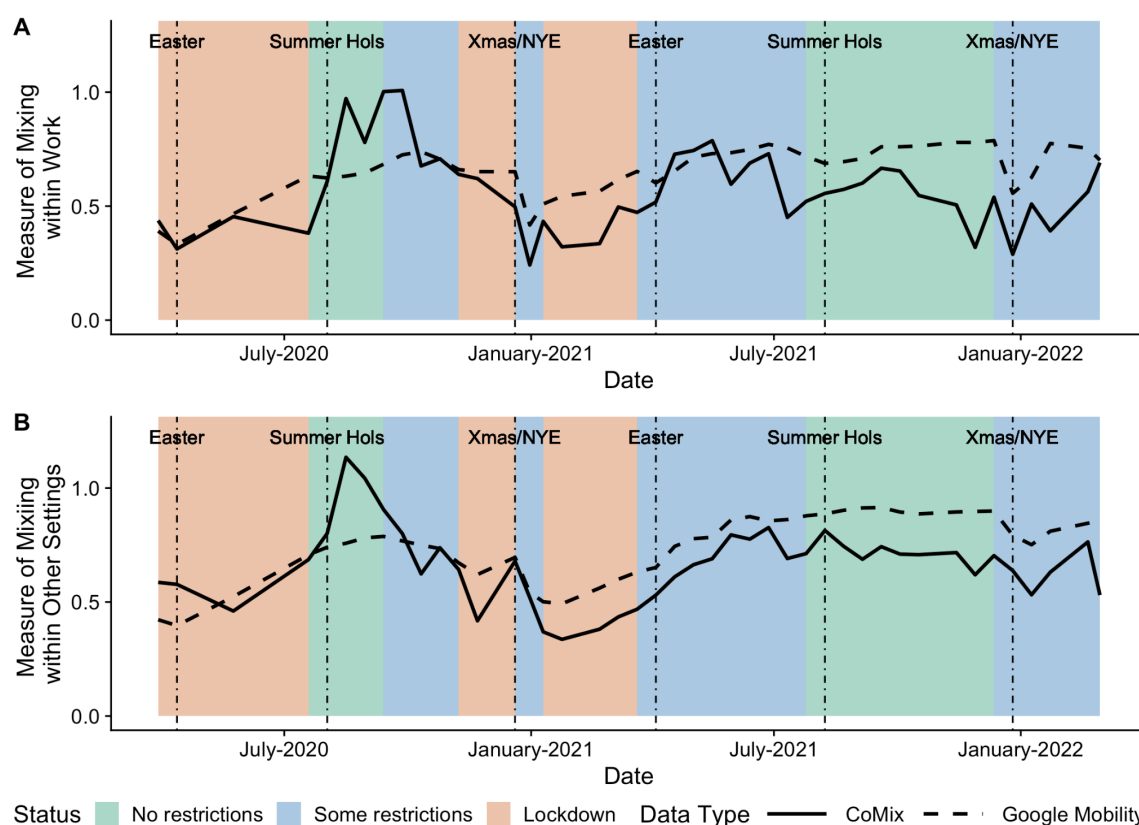

Figure 2: Contacts against mobility over time. Plot A shows mean “work” contacts (solid line) and “workplace” mobility (dashed line) and plot B shows mean “other” contacts (solid line) and “other” mobility (dashed line), over time respectively.

Figure 2 compares the mean daily number of “work” contacts from CoMix to the number of visits to “workplaces” in Google Mobility, and the mean daily number of “other” contacts from CoMix to the “other” visits in Google Mobility (see methods). Trends in both data sources are broadly similar, although the relationship between mobility and contacts appears to change over time, with a notable difference between “work” contacts and “workplace” mobility in the second year of data available.

### 3.2 Statistical Analysis

Here we compare four possible models for estimating contact rates based on mobility data to determine the most appropriate method to use when contact data is not directly available. We compare two naïve models (mobility and mobility squared) and two regression models (linear and quadratic), with the regression models fitted to data from the UK in the first year of the pandemic. We found that the quadratic regression model fitted the within-sample data better than the linear regression model (Fig. 3). Specifically, comparing the regression models by AIC, the quadratic model outperformed the linear model for both “work” contacts (linear regression: -32.4, quadratic regression: -42.6) and “other” contacts (linear regression: -29.9, quadratic regression: -57.8).

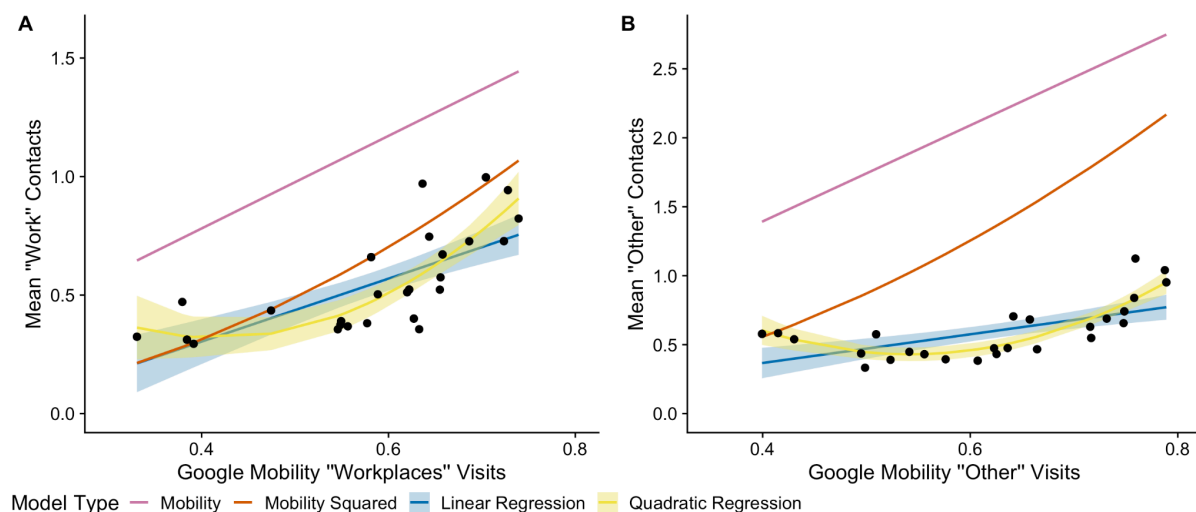

Figure 3: Comparison of the four models to contact data from the UK. (A) “work” contacts; (B) “other” contacts. Shaded areas show the confidence intervals for the regression model predictions and the black points show the raw data used in the regression models. The “naïve” curves are calculated by multiplying the mobility for a specific date by the POLYMOD estimate for that contact type (“work” for “workplace” mobility and “other” for “other” mobility).

The two regression models greatly outperformed the naïve models with respect to the within-sample data. Both naïve models (mobility and mobility squared) overestimated the mean number of contacts in “work” and “other” settings (Fig. 3). However, the overestimation was less pronounced for the mobility squared model in the “work” setting. Parameter estimates for the regression models are given in the supplementary material (Tables S1-S4).

We then compared the four models’ performance on out-of-sample data: data from the UK during the second year of the pandemic, and data for Belgium and the Netherlands from the first year of the pandemic. In order to make the model fitted to UK data translatable to the other countries, we first rescaled the output of the four models according to the relative mean number of contacts in the target country (Belgium / Netherlands) compared to the UK, according to the POLYMOD study.

We then scaled synthetic matrices for the three countries (23) to the number of contacts over time in the “work” and “other” settings as calculated by the four mobility models, and we calculated the dominant eigenvalues of these scaled matrices. We then transformed the dominant eigenvalues into partial reproduction numbers using a multiplicative factor of 0.158, calculated using the formula given in section 2.3.2, to express the results on a comprehensible quantitative scale.

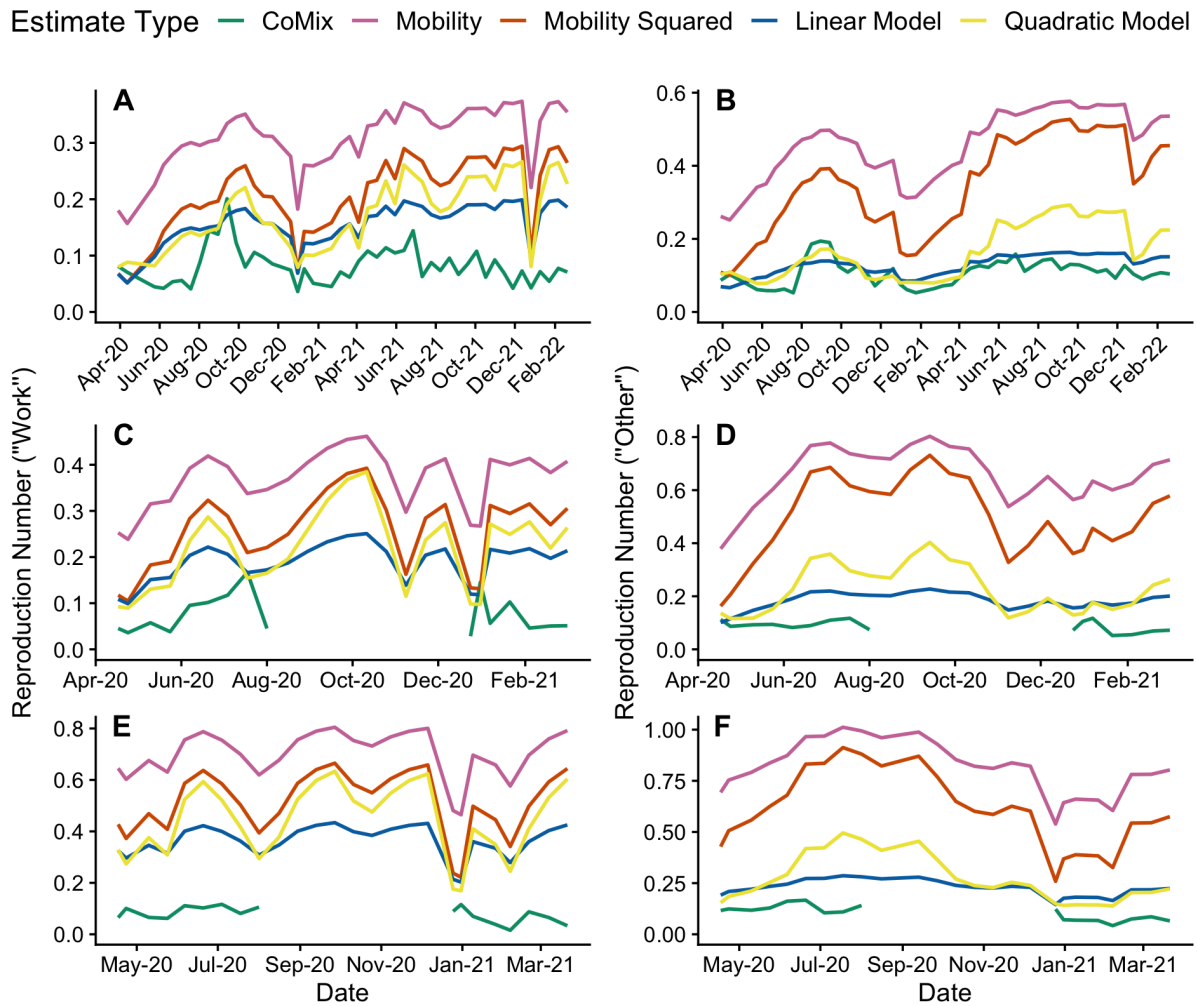

Figure 4: Partial reproduction numbers over time for each estimate type. Panels A and B are "work" and "other" estimates respectively, for the UK; panels C and D are "work" and "other" estimates respectively, for Belgium; panels E and F are "work" and "other" estimates respectively, for the Netherlands. For all panels the green line indicates the partial reproduction number calculated from the CoMix data; other coloured lines indicate partial reproduction numbers estimated from the four mobility models.

Focusing first on the UK setting, panels A and B in Figure 4 show that during the first year of predictions (using in-sample-data), the predictions made by the quadratic and linear models are not very distinguishable. This can be shown by comparing the root MSE for the linear models ("work": 0.0649, "other": 0.0365) and the quadratic models ("work": 0.0626, "other": 0.0264). When the second year of UK data is included (out-of-sample data), predictions diverge. Predictions from the quadratic model now over-estimate the partial reproduction number. This can be seen from the root MSE for the linear models ("work": 0.5384, "other": 0.2265), which are smaller than those for the quadratic models ("work": 0.6970, "other": 0.5569). The difference is both visually and quantitatively more clear for the "other" contacts. The results show that the best method to predict the partial reproduction number is the linear regression model, the worst method is using mobility, untransformed. This is shown by the root MSE for when only the first year of data is used

("work": 0.2031, "other": 0.3070) and when both first and second years are used ("work": 1.4955, "other": 2.3167). To see all root MSE values, see Tables S6 and S7)

For Belgium, data for comparison is sparse, but where a comparison can be made, the regression model scaled estimates appear closer than the naïve model scaled estimates (panels C and D in Figure 4). When looking at the root MSE (Tables S7 and S8) the best-performing model is the linear regression model ("work": 0.113, "other": 0.0962) and the worst-performing is the naïve mobility model ("work": 0.283, "other": 0.552).

Similarly, for the Netherlands the estimates using the regression models are closer than the estimates from the naïve models (panels E and F in Figure 4). The model with the smallest root MSE was the linear regression model ("work": 0.270, "other": 0.121) and, as with the UK and Belgium, the model with the largest root MSE was the naïve mobility model ("work": 0.595, "other": 0.693).

#### 4. Discussion

Amidst the challenges of the COVID-19 pandemic, our research delves into the use of aggregated mobility data to understand shifting social contact rates. This investigation is the first to compare mobility indicators and contact matrices, and shows that "naïve" mobility data can be improved upon as a method to measure transmission potential. We focused on predicting changes to contacts during large-scale restrictions by transforming pre-pandemic contact matrices with pandemic-era mobility data. To ascertain the most effective transformation method, we compared four approaches: two utilising regression models and two employing "naïve" models based on mobility or mobility squared. Our regression models, developed with CoMix contact survey and Google mobility data from the UK, proved more accurate in predicting contacts than the naïve models. Notably, even when applied to Belgium and the Netherlands, our regression models outperformed the naïve models.

During the COVID-19 pandemic, mobility data has been widely used to get insights into the spread of SARS-CoV-2 (27). Two main approaches have been used: some studies have tried to establish a relation between mobility and transmission (28), while others have related mobility to contact rates (29,30). While the former approach is suitable for identifying which mobility data better provides insights into epidemic spread, the latter approach has the advantage of a more natural implementation within mathematical models of infectious diseases (31,32) and is the one we focus our attention on in this work.

When comparing mobility and contact rates, we see that there was an apparent association between the respective contacts and mobility indicators (Figure 2), although this was stronger for the first year of data available. For both "work" and "other" contacts, the mean number of contacts is lower in the second year of the study relative to the corresponding mobility. This may indicate that there was a change in participant behaviour, a change in the relationship between mobility and contacts or a change in participant recruitment. This was the motivation for using the first year of data when creating the predictive models in this investigation. Indeed, the relationship between contacts and mobility is expected to be

time-varying and although mobility has been found to be very predictive of social contacts during lockdown in China, this was not the case in the post-lockdown scenario (33). Also, several factors such as risk perception do affect both mobility and contacts to a different degree (34,35), therefore potentially affecting their mutual relationship.

We found that contact rates for the UK were generally better predicted, as the models used to form the relative contact rates were created using UK data. It is worth noting that CoMix data was not available for some of the study period for Belgium and the Netherlands, therefore we had less data to test the accuracy of the predictions made in these countries. This also means that the root mean squared error does not account for predictions in this period as there is no 'true' value to compare to. For the times where data was available for Belgium and the Netherlands, the countries were for the most part under some restrictions; this is why the CoMix estimates were often consistently low. Therefore, it is difficult to determine whether the accuracy of the approximations would be better or worse when no restrictions were in place. Nonetheless, for the UK, when restrictions were not in place, the accuracy of the approximations remained consistent with their accuracy during restriction periods.

This investigation is limited by the fact that Google mobility data is difficult to define; not much information is available on how the indicators are constructed. In addition, CoMix surveys were not available throughout the entire study period for countries other than the UK, which limited the extent to which we were able to determine the accuracy of the results outside of the UK. As CoMix panels were surveyed repeatedly over extended periods, it is likely that a certain amount of survey fatigue began to impact responses. This is a limitation in the analysis for the UK data especially, given the number of surveys collected. In addition to this, a limitation of the study is that POLYMOD UK estimates were used to scale regression model results, in addition to informing the construction of the synthetic matrices from Prem et al., leading to potentially circular reasoning. However, the POLYMOD estimates for Belgium and the Netherlands are not used and so this limitation does not apply to estimates outside of the UK. In addition to this, we also compared the POLYMOD estimates with estimates from a survey conducted by Warwick university (36) and found both provided similar levels of baseline contacts. A further limitation of this study is that only western European countries have been used to make out-of-sample predictions, potentially limiting the applicability of our results when considering settings which may have dissimilar social behaviours or which adopted different pandemic-era restrictions. This is due to the fact that data availability of contact surveys conducted in other countries is extremely limited, and therefore there is no 'true' value to compare predictions to for these countries.

The study underscores the value of employing publicly-available data from pandemic contexts when estimating social contact rates without the resources for contact surveys. If given the choice between mobility and mobility squared to scale pre-pandemic contacts, the best approximation comes from mobility squared. However, the relative contact rates produced using the parameter estimates given above do provide better approximations than from using mobility data on its own. This investigation shows that the linear regression models provide the best approximations for partial reproduction number estimates

out-of-sample. It is therefore our recommendation that this method is used to predict both contact matrices and reproduction numbers as opposed to using only 'raw' information from mobility metrics.

## References

1. CMMID Repository [Internet]. 2020 [cited 2023 Jan 13]. CoMix study - Social contact survey in the UK. Available from: <https://cmmid.github.io/topics/covid19/comix-reports.html>
2. Jarvis CI, Van Zandvoort K, Gimma A, Prem K, Klepac P, Rubin GJ, et al. Quantifying the impact of physical distance measures on the transmission of COVID-19 in the UK. *BMC Med*. 2020 May 7;18:124.
3. Coletti P, Wambua J, Gimma A, Willem L, Vercruysse S, Vanhoutte B, et al. CoMix: comparing mixing patterns in the Belgian population during and after lockdown. *Sci Rep*. 2020 Dec 14;10(1):21885.
4. Backer JA, Bogaardt L, Beutels P, Coletti P, Edmunds WJ, Gimma A, et al. Dynamics of non-household contacts during the COVID-19 pandemic in 2020 and 2021 in the Netherlands. *Sci Rep*. 2023 Mar 30;13(1):5166.
5. Verelst F, Hermans L, Vercruysse S, Gimma A, Coletti P, Backer JA, et al. SOCRATES-CoMix: a platform for timely and open-source contact mixing data during and in between COVID-19 surges and interventions in over 20 European countries. *BMC Med*. 2021 Sep 29;19(1):254.
6. Weidemann F, Renschmidt C, Buda S, Buchholz U, Ultsch B, Wichmann O. Is the impact of childhood influenza vaccination less than expected: a transmission modelling study. *BMC Infect Dis*. 2017 Apr 11;17(1):258.
7. Meyer S, Held L. Incorporating social contact data in spatio-temporal models for infectious disease spread. *Biostat Oxf Engl*. 2017 Apr;18(2):338–51.
8. Tizzoni M, Bajardi P, Decuyper A, King GKK, Schneider CM, Blondel V, et al. On the Use of Human Mobility Proxies for Modeling Epidemics. *PLOS Comput Biol*. 2014 Jul 10;10(7):e1003716.
9. COVID-19 Community Mobility Reports [Internet]. [cited 2023 Jan 13]. Available from: <https://www.google.com/covid19/mobility/>
10. Nouvellet P, Bhatia S, Cori A, Ainslie KEC, Baguelin M, Bhatt S, et al. Reduction in mobility and COVID-19 transmission. *Nat Commun*. 2021 Feb 17;12(1):1090.
11. Real-time nowcasting and forecasting of COVID-19 dynamics in England: the first wave | Philosophical Transactions of the Royal Society B: Biological Sciences [Internet]. [cited 2023 May 31]. Available from: <https://royalsocietypublishing.org/doi/full/10.1098/rstb.2020.0279#d1e3299>
12. Gozzi N, Chinazzi M, Dean NE, Longini IM, Halloran ME, Perra N, et al. Estimating the impact of COVID-19 vaccine allocation inequities: a modeling study [Internet]. medRxiv; 2022 [cited 2023 May 31]. p. 2022.11.18.22282514. Available from: <https://www.medrxiv.org/content/10.1101/2022.11.18.22282514v1>
13. Gozzi N, Tizzoni M, Chinazzi M, Ferres L, Vespignani A, Perra N. Estimating the effect of social inequalities on the mitigation of COVID-19 across communities in Santiago de Chile. *Nat Commun*. 2021 Apr 23;12(1):2429.
14. Overview - Community Mobility Reports Help [Internet]. [cited 2023 Jan 13]. Available from: [https://support.google.com/covid19-mobility/answer/9824897?hl=en&ref\\_topic=9822927](https://support.google.com/covid19-mobility/answer/9824897?hl=en&ref_topic=9822927)
15. Gimma A, Munday JD, Wong KLM, Coletti P, Zandvoort K van, Prem K, et al. Changes in social contacts in England during the COVID-19 pandemic between March 2020 and March 2021 as measured by the CoMix survey: A repeated cross-sectional study. *PLOS Med*. 2022 Mar 1;19(3):e1003907.
16. Mossong J, Hens N, Jit M, Beutels P, Auranen K, Mikolajczyk R, et al. Social contacts and mixing patterns relevant to the spread of infectious diseases. *PLoS Med*. 2008 Mar 25;5(3):e74.

17. Gimma A, Wong KL, Van Zandvoort K, Jarvis CI, Edmunds WJ. CoMix social contact data (UK) [Internet]. Zenodo; 2024 [cited 2024 Sep 30]. Available from: <https://zenodo.org/records/13684044>
18. Coletti P, Wambua J, Gimma A, Willem L, Vercruysse S, Vanhoutte B, et al. CoMix social contact data (Belgium) [Internet]. Zenodo; 2020 [cited 2024 Sep 30]. Available from: <https://zenodo.org/records/10549953>
19. Backer J, Bogaardt L, Wallinga J. CoMix social contact data (Netherlands) [Internet]. Zenodo; 2021 [cited 2024 Sep 30]. Available from: <https://zenodo.org/records/7276465>
20. R: The R Project for Statistical Computing [Internet]. [cited 2023 Sep 21]. Available from: <https://www.r-project.org/>
21. Davies NG, Barnard RC, Jarvis CI, Russell TW, Semple MG, Jit M, et al. Association of tiered restrictions and a second lockdown with COVID-19 deaths and hospital admissions in England: a modelling study. *Lancet Infect Dis*. 2021 Apr;21(4):482–92.
22. confint function - RDocumentation [Internet]. [cited 2024 Apr 5]. Available from: <https://www.rdocumentation.org/packages/stats/versions/3.6.2/topics/confint>
23. Prem K, Zandvoort K van, Klepac P, Eggo RM, Davies NG, Centre for the Mathematical Modelling of Infectious Diseases COVID-19 Working Group, et al. Projecting contact matrices in 177 geographical regions: An update and comparison with empirical data for the COVID-19 era. *PLoS Comput Biol*. 2021 Jul;17(7):e1009098.
24. epiforecasts/covid-rt-estimates: National and subnational estimates of the time-varying reproduction number for Covid-19 [Internet]. [cited 2023 Jul 17]. Available from: <https://github.com/epiforecasts/covid-rt-estimates/tree/master>
25. Census - Office for National Statistics [Internet]. [cited 2023 Aug 22]. Available from: <https://www.ons.gov.uk/census>
26. Ipsos [Internet]. 2009 [cited 2023 Aug 22]. Social Grade. Available from: <https://www.ipsos.com/en-uk/social-grade>
27. Alessandretti L. What human mobility data tell us about COVID-19 spread. *Nat Rev Phys*. 2022 Jan;4(1):12–3.
28. Bergman NK, Fishman R. Correlations of mobility and Covid-19 transmission in global data. *PLOS ONE*. 2023 Jul 19;18(7):e0279484.
29. Tomori DV, Rübsamen N, Berger T, Scholz S, Walde J, Wittenberg I, et al. Individual social contact data and population mobility data as early markers of SARS-CoV-2 transmission dynamics during the first wave in Germany—an analysis based on the COVIMOD study. *BMC Med*. 2021 Oct 14;19(1):271.
30. Lajot A, Wambua J, Coletti P, Franco N, Brondeel R, Faes C, et al. How contact patterns during the COVID-19 pandemic are related to pre-pandemic contact patterns and mobility trends. *BMC Infect Dis*. 2023 Jun 16;23(1):410.
31. Hoang T, Coletti P, Melegaro A, Wallinga J, Grijalva CG, Edmunds JW, et al. A Systematic Review of Social Contact Surveys to Inform Transmission Models of Close-contact Infections. *Epidemiol Camb Mass*. 2019 Sep;30(5):723–36.
32. Keeling MJ, Rohani P. *Modeling Infectious Diseases in Humans and Animals* [Internet]. Princeton University Press; 2008 [cited 2023 Sep 22]. Available from: <https://www.jstor.org/stable/j.ctvcm4gk0>
33. Zhang J, Litvinova M, Liang Y, Zheng W, Shi H, Vespignani A, et al. The impact of relaxing interventions on human contact patterns and SARS-CoV-2 transmission in China. *Sci Adv*. 2021 May 7;7(19):eabe2584.
34. Wu S, Grant-Muller S, Yang L. Modelling the Mobility Changes Caused by Perceived Risk and Policy Efficiency. *ISPRS Int J Geo-Inf*. 2022 Aug;11(8):453.
35. Wambua J, Loedy N, Jarvis CI, Wong KLM, Faes C, Grah R, et al. The influence of COVID-19 risk perception and vaccination status on the number of social contacts across Europe: insights from the CoMix study. *BMC Public Health*. 2023 Jul 13;23(1):1350.
36. Danon L, Read JM, Keeling MJ, House TA, Vernon MC. Social contact study

[Internet]. University of Warwick, Department of Biological Sciences; 2009 [cited 2023 Mar 16]. Available from: <http://wrap.warwick.ac.uk/54273>

## Supplementary Material

|                                                                 |    |
|-----------------------------------------------------------------|----|
| S.1 Regression Models                                           | 20 |
| S.1.1 "Work" contacts against "workplace" indicator             | 20 |
| S.1.2 "Other" contacts against weighted predictor of indicators | 20 |
| S.2 Baseline Contact Levels                                     | 20 |
| S.3 Relative Contact Rates                                      | 20 |
| S.4 Supplementary Figures                                       | 21 |
| S.4.1 Age proportions over time                                 | 21 |
| S.4.2 Social class proportions over time                        | 21 |
| S.4.3 Employment status (employment age)                        | 22 |
| S.4.4 Reproduction numbers: UK "work" contacts                  | 22 |
| S.4.5 Reproduction numbers: UK "other" contacts                 | 24 |
| S.4.6 Reproduction numbers: Belgium "work" contacts             | 25 |
| S.4.7 Reproduction numbers: Belgium "other" contacts            | 26 |
| S.4.8 Reproduction numbers: Netherlands "work" contacts         | 27 |
| S.4.9 Reproduction numbers: Netherlands "other" contacts        | 28 |
| S.5 Supplementary Tables                                        | 29 |
| S.5.1 Comparing contacts and mobility                           | 29 |
| S.5.2 Regression models: "work" contacts                        | 30 |
| S.5.3 Regression models: "other" contacts                       | 30 |
| S.5.4 Reproduction numbers: UK                                  | 30 |
| S.5.5 Reproduction numbers: BE                                  | 31 |
| S.5.6 Reproduction numbers: NL                                  | 32 |

## S.1 Regression Models

### S.1.1 "Work" contacts against "workplace" indicator

The linear "work" model is:

$$work = \alpha + \beta \times workplace.$$

And the quadratic "work" model is:

$$work = \alpha + \beta_1 \times workplace + \beta_2 \times workplace^2.$$

### S.1.2 "Other" contacts against weighted predictor of indicators

The linear "other" model is:

$$other = \alpha + \beta \times predictor.$$

And the quadratic "other" model is:

$$other = \alpha + \beta_1 \times predictor + \beta_2 \times predictor^2.$$

## S.2 Baseline Contact Levels

As the CoMix survey was designed from the POLYMOD survey, conducted in 2005/2006 (16) this was an obvious choice for the baseline contact information. We compared this to the Warwick contact study, conducted in 2009 (36), to determine the suitability of the POLYMOD baseline. We found that both provided similar estimates of baseline contacts.

## S.3 Relative Contact Rates

For "work" contacts the relative contact rate for the linear model was calculated as follows:

$$work_{lin} = \frac{\alpha + \beta \times workplace}{baseline}.$$

And for the quadratic model:

$$work_{quad} = \frac{\alpha + \beta_1 \times workplace + \beta_2 \times workplace^2}{baseline}.$$

For "other" contacts the relative contact rate for the linear model was calculated as follows:

$$other_{lin} = \frac{\alpha + \beta \times predictor}{baseline}.$$

And for the quadratic model:

$$other_{quad} = \frac{\alpha + \beta_1 \times predictor + \beta_2 \times predictor^2}{baseline}.$$

## S.4 Supplementary Figures

### S.4.1 Age proportions over time

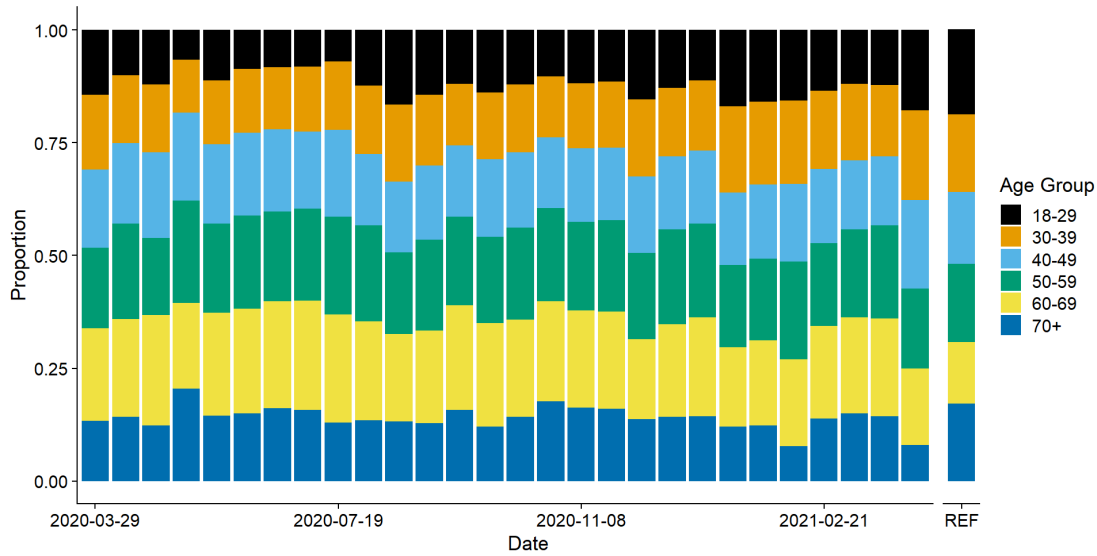

Figure S1: proportion of participants per age group by two week periods, REF shows the population proportions

### S.4.2 Social class proportions over time

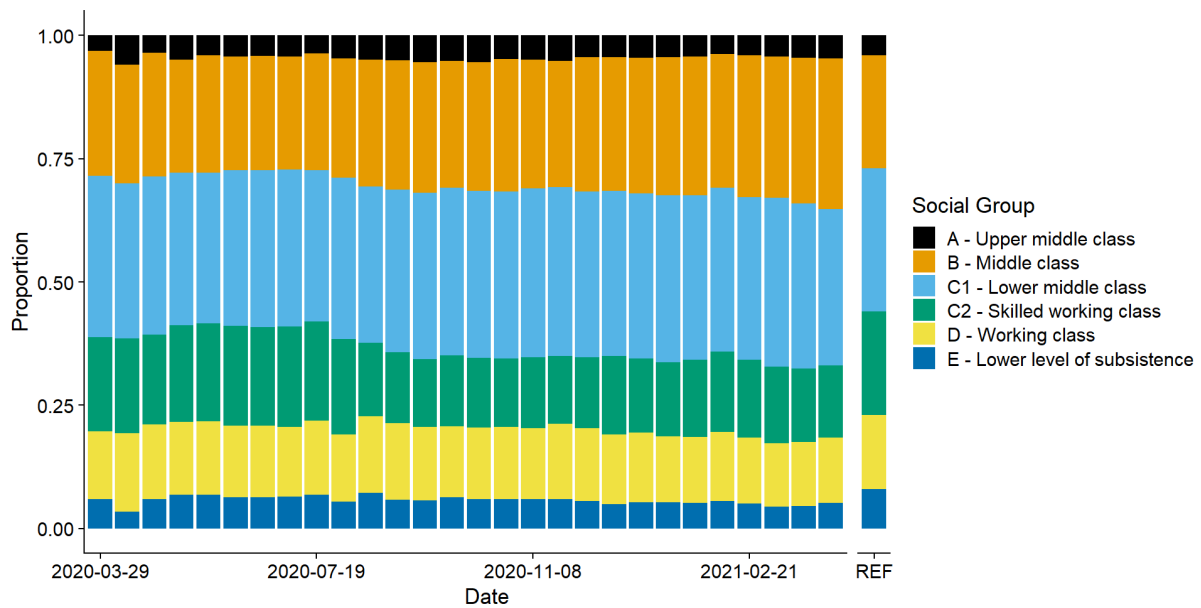

Figure S2: proportion of participants per social group by two week periods, REF shows the population proportions

#### S.4.3 Employment status (employment age)

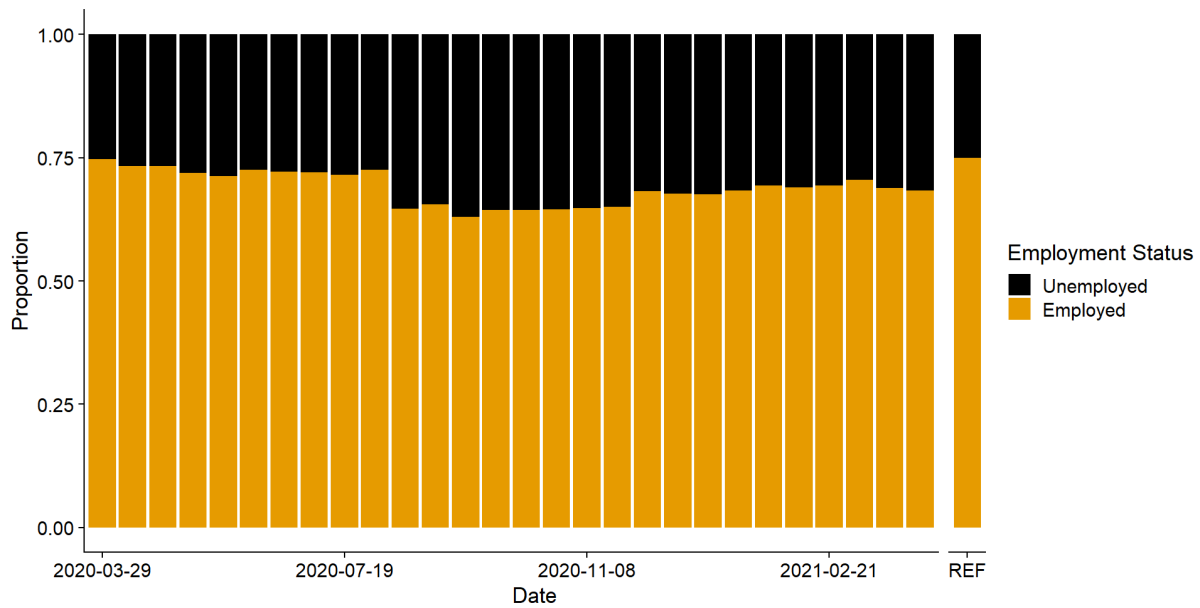

Figure S3: proportion of participants, of employment age, per employment status by two week periods, REF shows the population proportions

#### S.4.4 Reproduction numbers: UK "work" contacts

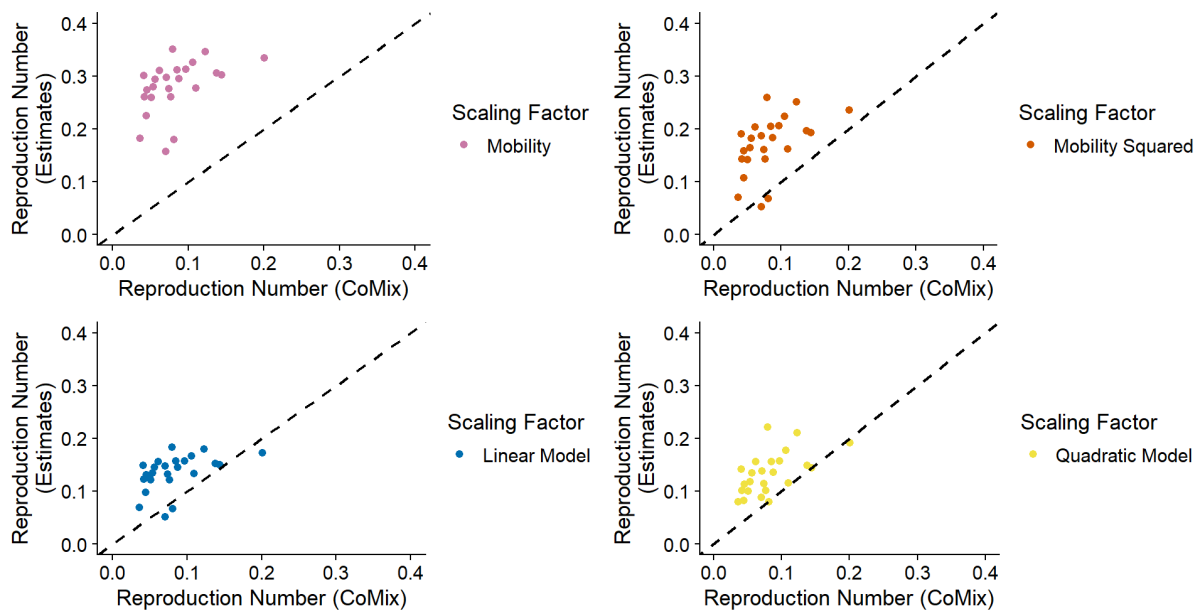

Figure S4A: reproduction number estimates against reproduction numbers from CoMix survey, top left shows estimates using mobility, top right shows estimates using mobility squared, bottom left shows estimates using the linear model relative contact rate and bottom right shows estimates using the quadratic model relative contact rate.

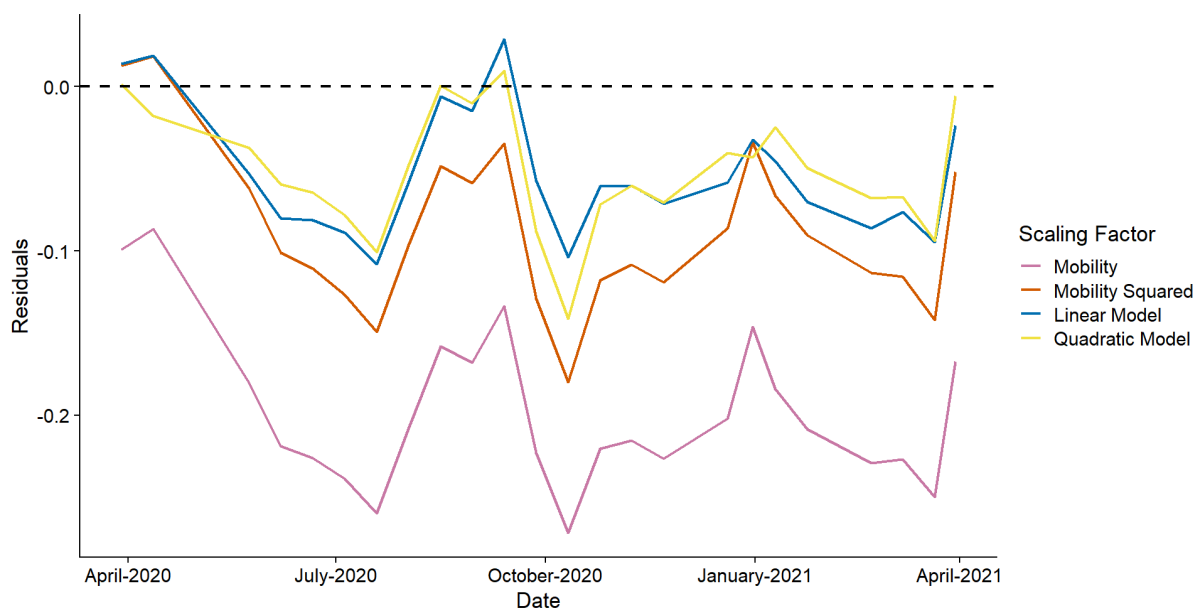

Figure S4B: residuals from the reproduction number estimates as compared to the estimates from the CoMix survey, the purple line shows estimates from the mobility scaled matrices, the red line shows estimates from the mobility squared scaled matrices, the blue line shows estimates from the linear model scaled matrices and the orange line shows estimates from the quadratic model scaled matrices.

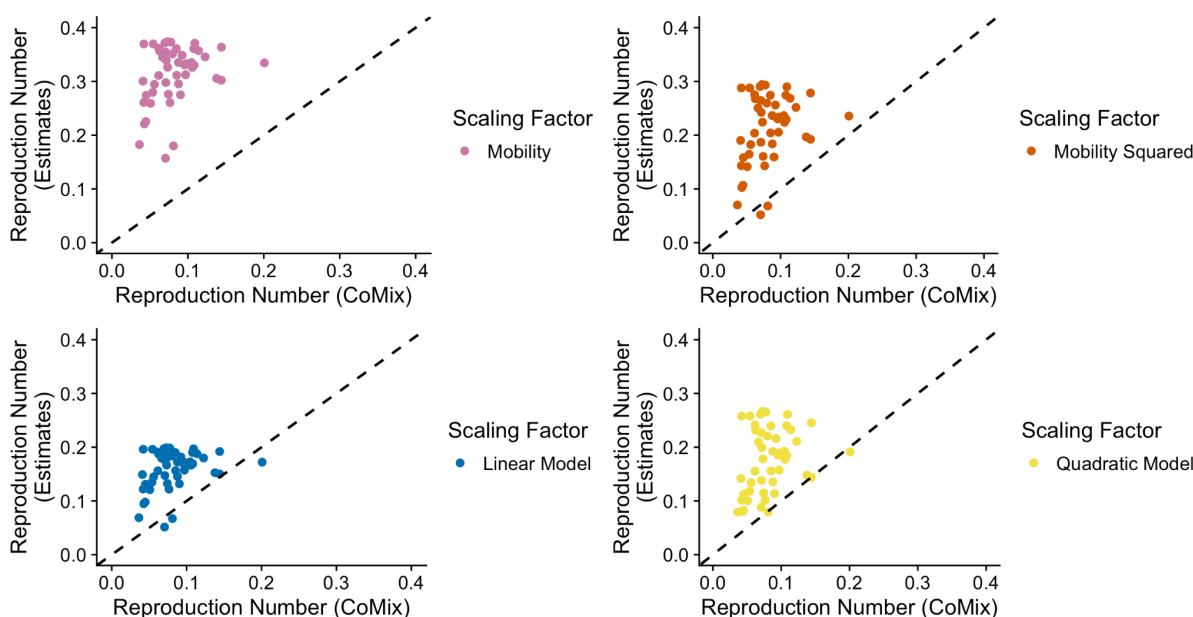

Figure S4C: reproduction number estimates against reproduction numbers from CoMix survey, for a longer time period. Top left shows estimates using mobility, top right shows estimates using mobility squared, bottom left shows estimates using the linear model relative contact rate and bottom right shows estimates using the quadratic model relative contact rate.

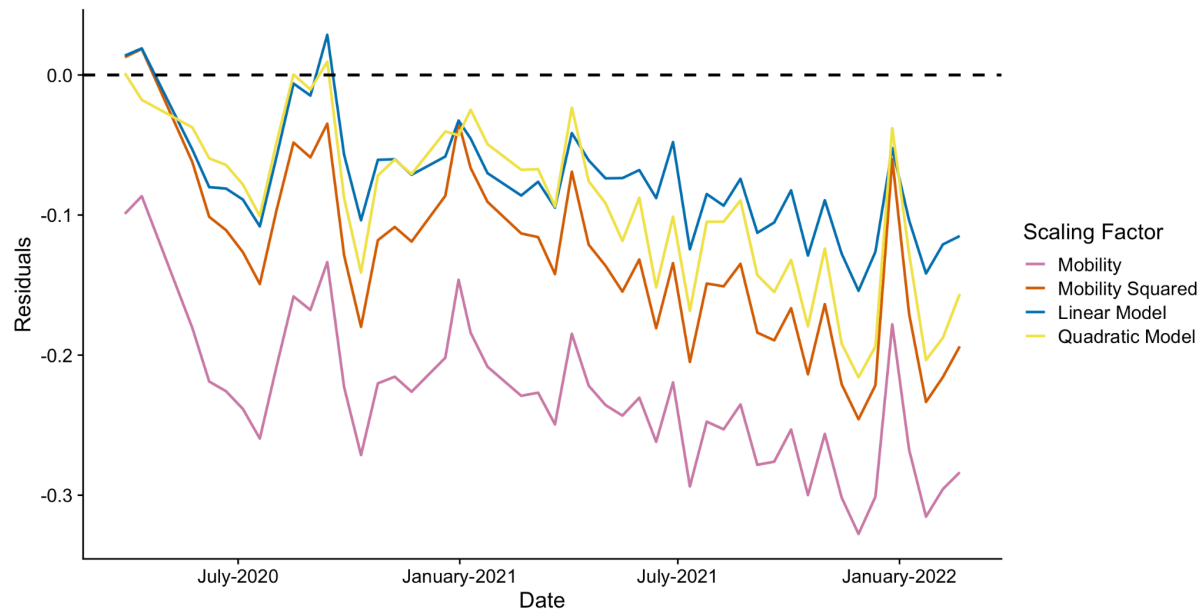

Figure S4D: residuals from the reproduction number estimates as compared to the estimates from the CoMix survey, for a longer time period. The purple line shows estimates from the mobility scaled matrices, the red line shows estimates from the mobility squared scaled matrices, the blue line shows estimates from the linear model scaled matrices and the orange line shows estimates from the quadratic model scaled matrices.

#### S.4.5 Reproduction numbers: UK "other" contacts

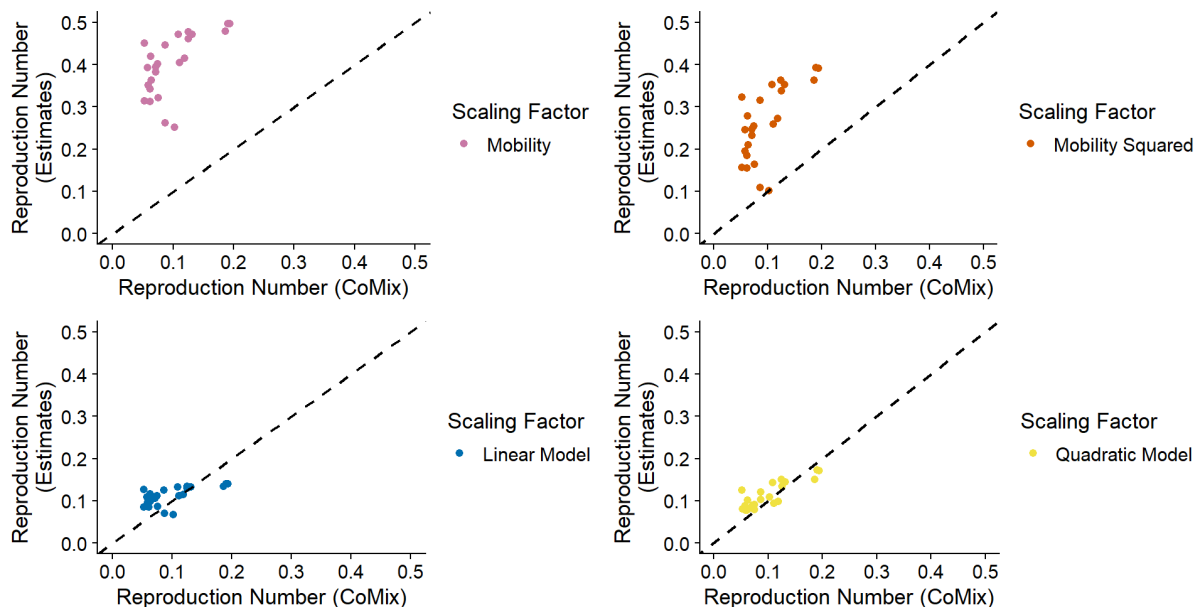

Figure S5A: reproduction number estimates against reproduction numbers from CoMix survey, top left shows estimates using mobility, for a longer time period. Top right shows estimates using mobility squared, bottom left shows estimates using the linear model relative contact rate and bottom right shows estimates using the quadratic model relative contact rate.

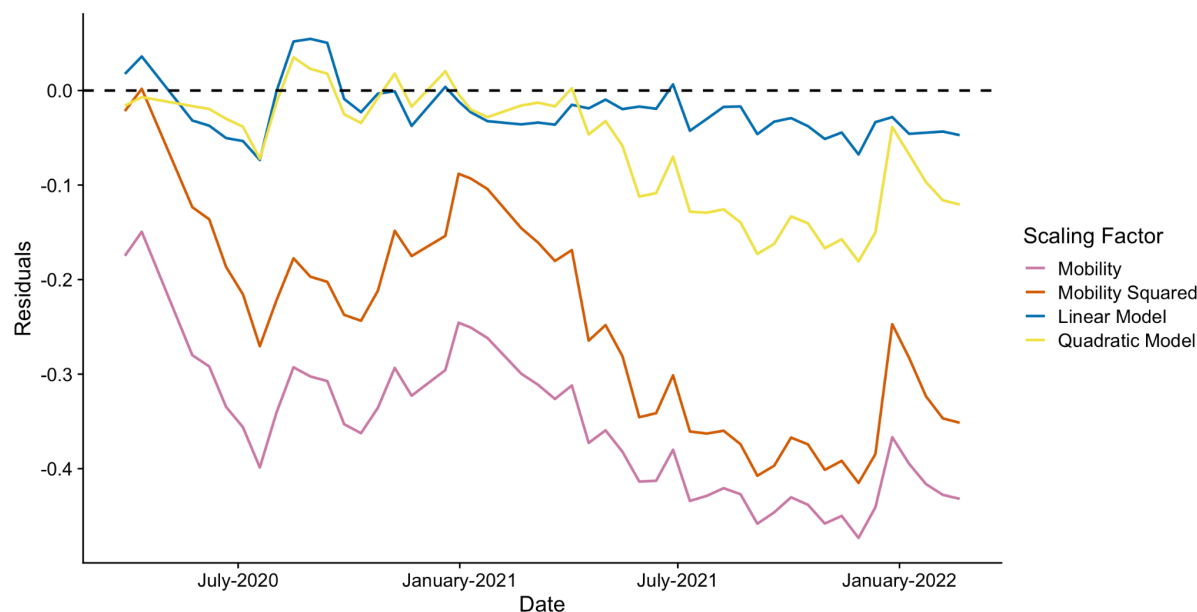

Figure S5B: residuals from the reproduction number estimates as compared to the estimates from the CoMix survey, for a longer time period. The purple line shows estimates from the mobility scaled matrices, the red line shows estimates from the mobility squared scaled matrices, the blue line shows estimates from the linear model scaled matrices and the orange line shows estimates from the quadratic model scaled matrices.

#### S.4.6 Reproduction numbers: Belgium “work” contacts

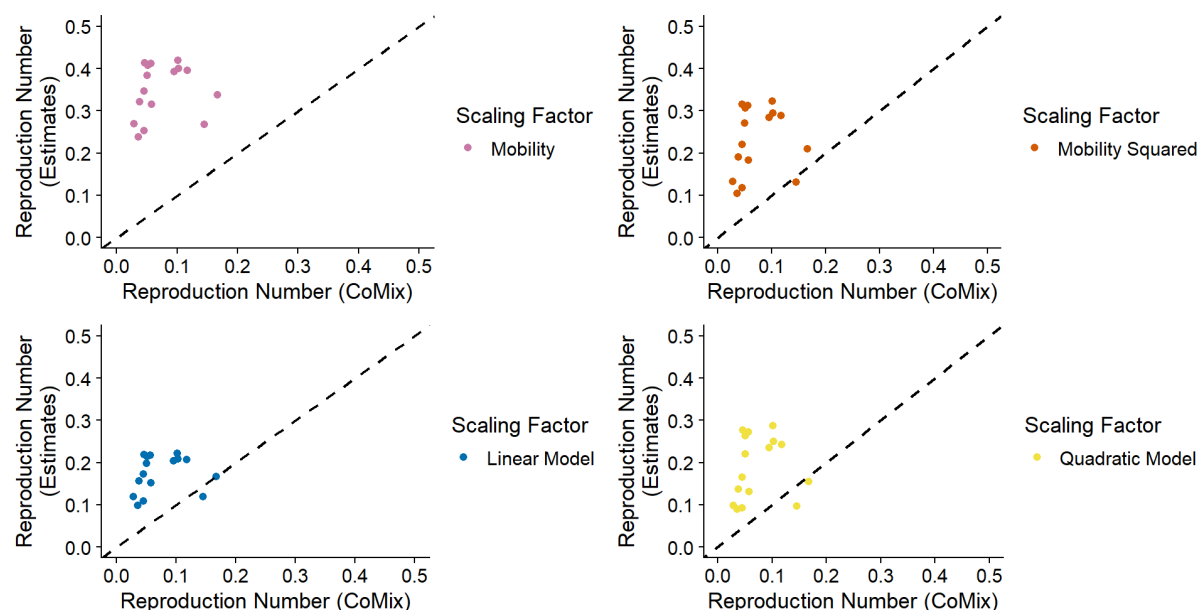

Figure S6A: reproduction number estimates against reproduction numbers from CoMix survey, top left shows estimates using mobility, top right shows estimates using mobility squared, bottom left shows estimates using the linear model relative contact rate and bottom right shows estimates using the quadratic model relative contact rate.

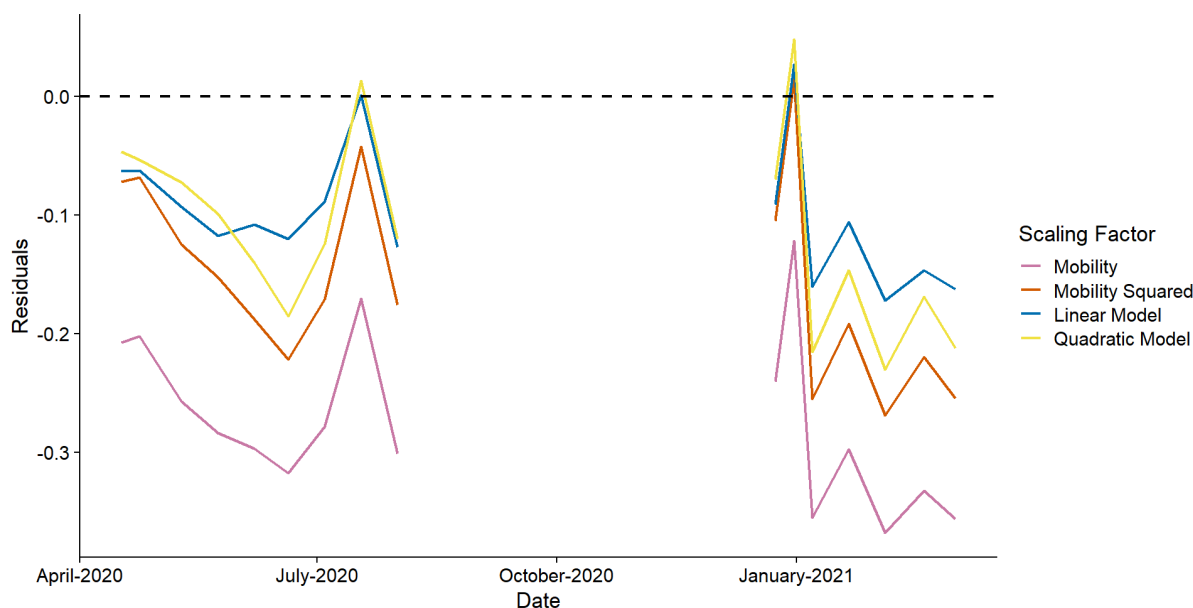

Figure S6B: residuals from the reproduction number estimates as compared to the estimates from the CoMix survey, the purple line shows estimates from the mobility scaled matrices, the red line shows estimates from the mobility squared scaled matrices, the blue line shows estimates from the linear model scaled matrices and the orange line shows estimates from the quadratic model scaled matrices.

#### S.4.7 Reproduction numbers: Belgium "other" contacts

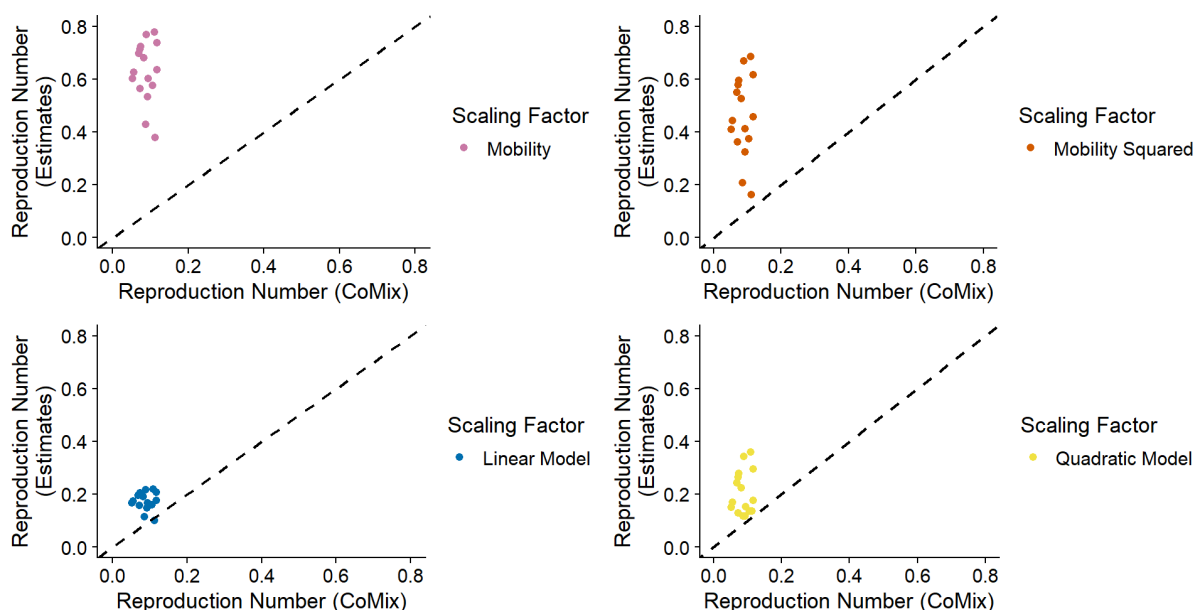

Figure S7A: reproduction number estimates against reproduction numbers from CoMix survey, top left shows estimates using mobility, top right shows estimates using mobility squared, bottom left shows estimates using the linear model relative contact rate and bottom right shows estimates using the quadratic model relative contact rate.

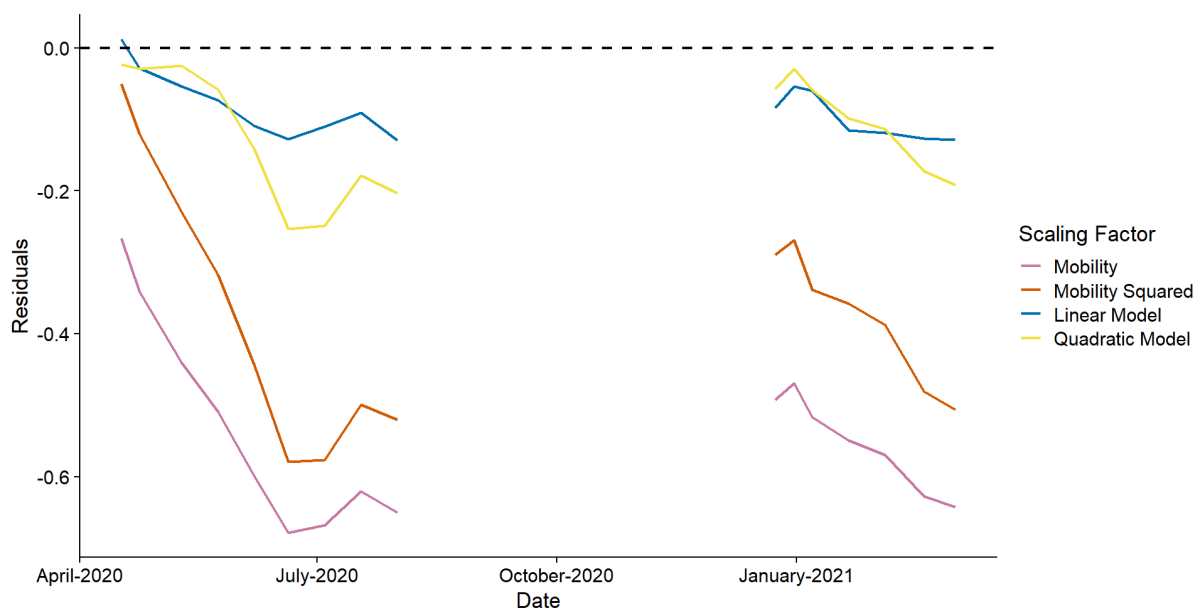

Figure S7B: residuals from the reproduction number estimates as compared to the estimates from the CoMix survey, the purple line shows estimates from the mobility scaled matrices, the red line shows estimates from the mobility squared scaled matrices, the blue line shows estimates from the linear model scaled matrices and the orange line shows estimates from the quadratic model scaled matrices.

#### S.4.8 Reproduction numbers: Netherlands "work" contacts

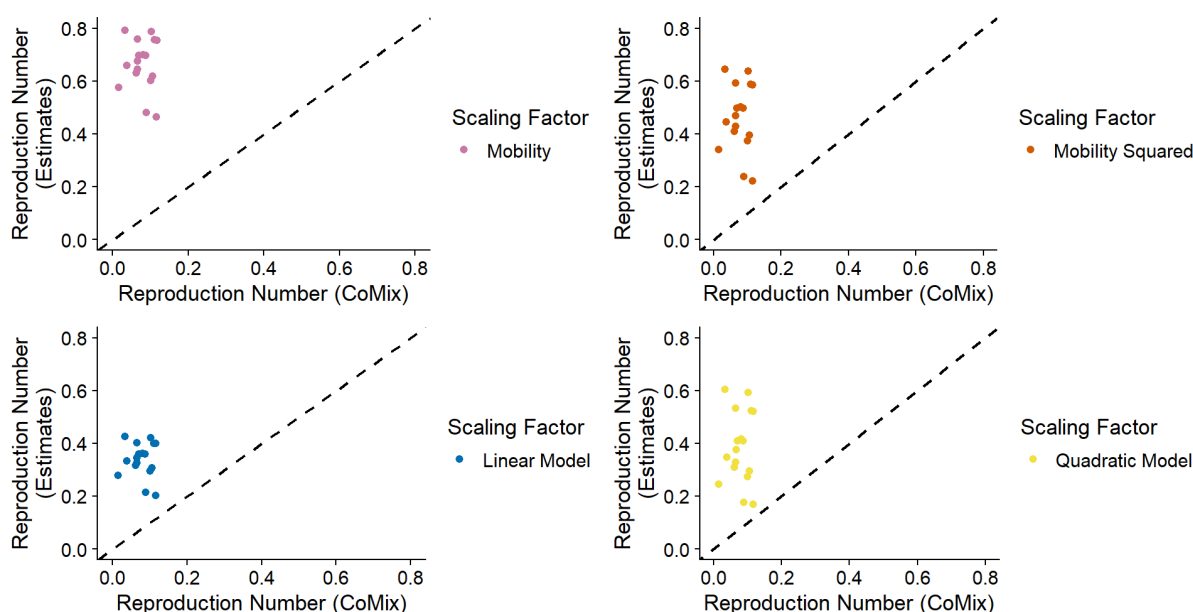

Figure S8A: reproduction number estimates against reproduction numbers from CoMix survey, top left shows estimates using mobility, top right shows estimates using mobility squared, bottom left shows estimates using the linear model relative contact rate and bottom right shows estimates using the quadratic model relative contact rate.

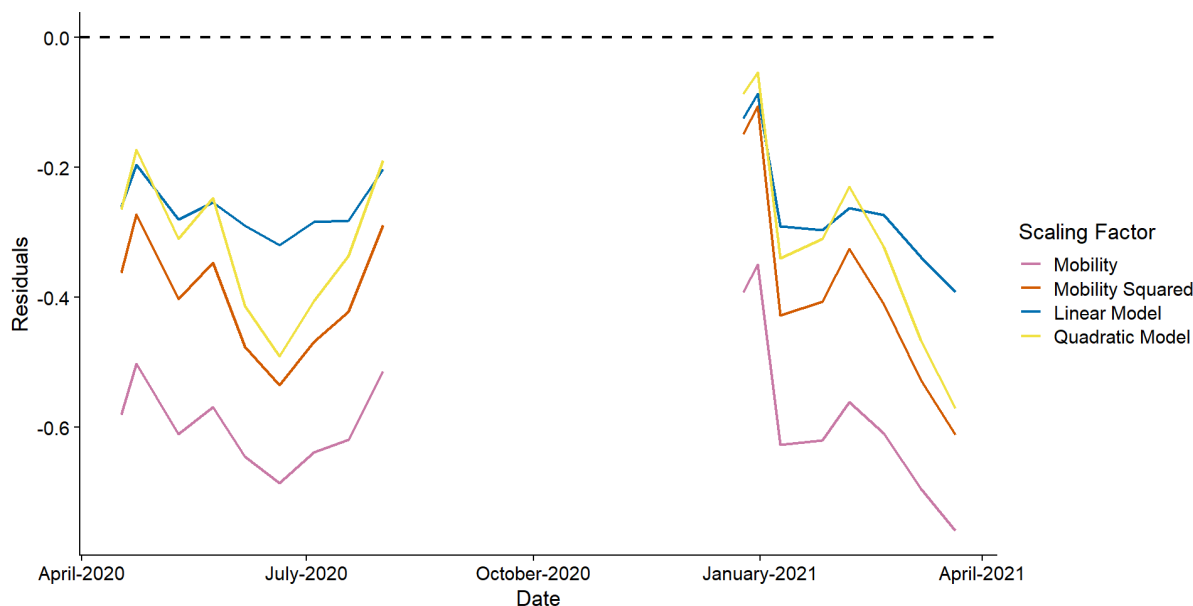

Figure S8B: residuals from the reproduction number estimates as compared to the estimates from the CoMix survey, the purple line shows estimates from the mobility scaled matrices, the red line shows estimates from the mobility squared scaled matrices, the blue line shows estimates from the linear model scaled matrices and the orange line shows estimates from the quadratic model scaled matrices.

#### S.4.9 Reproduction numbers: Netherlands "other" contacts

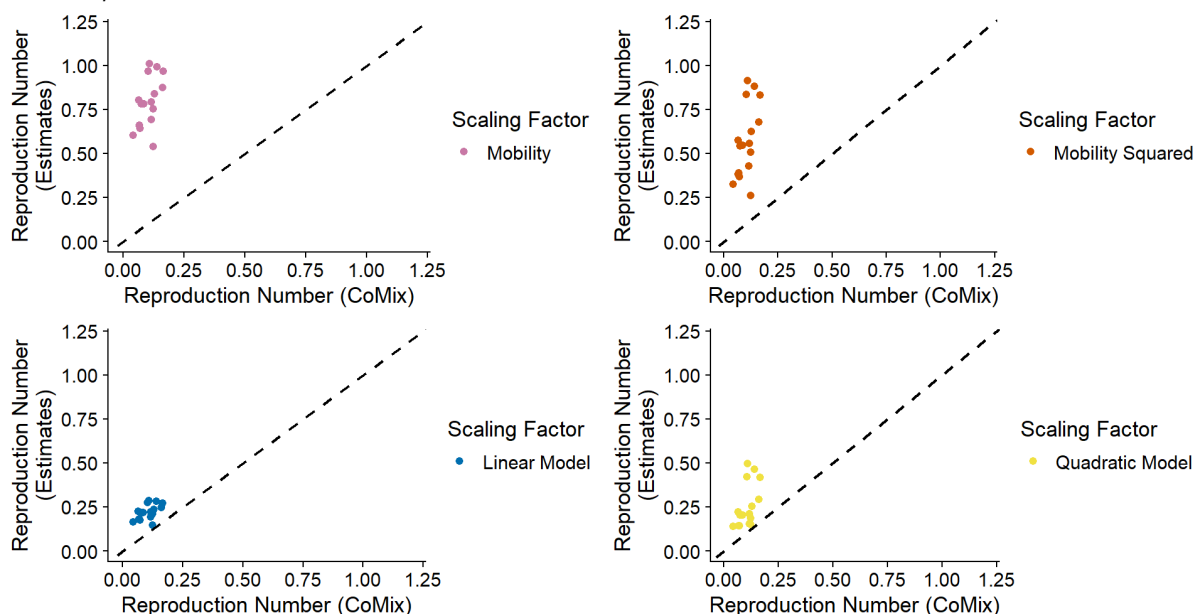

Figure S9A: reproduction number estimates against reproduction numbers from CoMix survey, top left shows estimates using mobility, top right shows estimates using mobility squared, bottom left shows estimates using the linear model relative contact rate and bottom right shows estimates using the quadratic model relative contact rate.

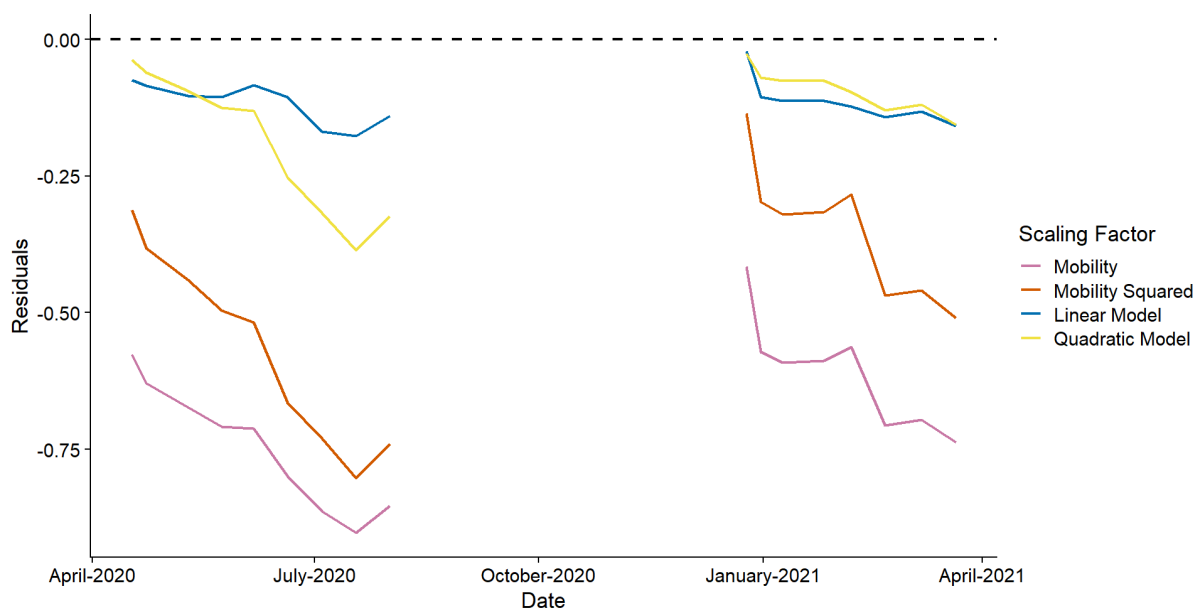

Figure S9B: residuals from the reproduction number estimates as compared to the estimates from the CoMix survey, the purple line shows estimates from the mobility scaled matrices, the red line shows estimates from the mobility squared scaled matrices, the blue line shows estimates from the linear model scaled matrices and the orange line shows estimates from the quadratic model scaled matrices.

## S.5 Supplementary Tables

### S.5.1 Comparing contacts and mobility

| Year | Contact Type | Correlation | P-Value  |
|------|--------------|-------------|----------|
| 1    | Work         | 0.7110      | 7.461e-5 |
| 1    | Other        | 0.7268      | 2.002e-5 |
| 2    | Work         | 0.3222      | 0.095    |
| 2    | Other        | 0.6713      | 8.154e-5 |

Table S1: correlations between contacts and mobility for the first and second years of data, Year 1 is defined as March 2020 to March 2021 and Year 2 is defined as April 2021 to April 2022. The p-values given are the result of a two-sided  $t$ -test.

### S.5.2 Regression models: "work" contacts

| <i>Parameter</i>     | <i>Estimate</i> | <i>95% Confidence Interval</i> |
|----------------------|-----------------|--------------------------------|
| Intercept            | -0.2273         | (-0.4882, 0.0335)              |
| "Workplace" mobility | 1.3280          | (0.8890, 1.7670)               |

Table S2: parameter estimates (and confidence interval) for linear regression model for "work" contacts

| <i>Parameter</i>             | <i>Estimate</i> | <i>95% Confidence Interval</i> |
|------------------------------|-----------------|--------------------------------|
| Intercept                    | 1.3169          | (0.4275, 2.2063)               |
| "Workplace" mobility         | -4.7718         | (-8.1921, -1.3514)             |
| "Workplace" mobility squared | 5.7062          | (2.5262, 8.8862)               |

Table S3: parameter estimates (and confidence interval) for quadratic regression model for "work" contacts

### S.5.3 Regression models: "other" contacts

| <i>Parameter</i>   | <i>Estimate</i> | <i>95% Confidence Interval</i> |
|--------------------|-----------------|--------------------------------|
| Intercept          | -0.0488         | (-0.3279, 0.2304)              |
| Weighted predictor | 1.0398          | (0.5971, 1.4824)               |

Table S4: parameter estimates (and confidence interval) for linear regression model for "other" contacts

| <i>Parameter</i>           | <i>Estimate</i> | <i>95% Confidence Interval</i> |
|----------------------------|-----------------|--------------------------------|
| Intercept                  | 2.9441          | (1.9893, 3.8988)               |
| Weighted predictor         | -9.2762         | (-12.5159, -6.0366)            |
| Weighted predictor squared | 8.5566          | (5.8811, 11.2322)              |

Table S5: parameter estimates (and confidence interval) for quadratic regression model for "other" contacts

### S.5.4 Reproduction numbers: UK

| <i>Estimate Type</i> | <i>Root MSE</i> |
|----------------------|-----------------|
| Quadratic model      | 0.0626          |
| Linear model         | 0.0649          |

|                         |        |
|-------------------------|--------|
| Mobility squared        | 0.1001 |
| Mobility                | 0.2031 |
| <i>Including Year 2</i> |        |
| Linear model            | 0.5384 |
| Quadratic model         | 0.6970 |
| Mobility squared        | 0.9094 |
| Mobility                | 1.4955 |

Table S6: root mean squared error for all “work” estimates for the UK, this is the square root of the mean of the squared differences between the CoMix survey reproduction number and the estimated reproduction number

| <i>Estimate Type</i>    | <i>Root MSE</i> |
|-------------------------|-----------------|
| Quadratic model         | 0.0264          |
| Linear model            | 0.0365          |
| Mobility squared        | 0.1762          |
| Mobility                | 0.3070          |
| <i>Including Year 2</i> |                 |
| Linear model            | 0.2265          |
| Quadratic model         | 0.5569          |
| Mobility squared        | 1.7282          |
| Mobility                | 2.3167          |

Table S7: root mean squared error for all “other” estimates for the UK, this is the square root of the mean of the squared differences between the CoMix survey reproduction number and the estimated reproduction number

### S.5.5 Reproduction numbers: BE

| <i>Estimate Type</i> | <i>Root MSE</i> |
|----------------------|-----------------|
| Linear model         | 0.1130          |
| Quadratic model      | 0.1384          |
| Mobility squared     | 0.1757          |
| Mobility             | 0.2825          |

Table S8: root mean squared error for all “work” estimates for Belgium, this is the square root of the mean of the squared differences between the CoMix survey reproduction number and the estimated reproduction number

| <i>Estimate Type</i> | <i>Root MSE</i> |
|----------------------|-----------------|
| Linear model         | 0.0962          |
| Quadratic model      | 0.1420          |
| Mobility squared     | 0.4025          |
| Mobility             | 0.5520          |

Table S9: root mean squared error for all "other" estimates for Belgium, this is the square root of the mean of the squared differences between the CoMix survey reproduction number and the estimated reproduction number

#### S.5.6 Reproduction numbers: NL

| <i>Estimate Type</i> | <i>Root MSE</i> |
|----------------------|-----------------|
| Linear model         | 0.2703          |
| Quadratic model      | 0.3346          |
| Mobility squared     | 0.4050          |
| Mobility             | 0.5950          |

Table S10: root mean squared error for all "work" estimates for the Netherlands, this is the square root of the mean of the squared differences between the CoMix survey reproduction number and the estimated reproduction number

| <i>Estimate Type</i> | <i>Root MSE</i> |
|----------------------|-----------------|
| Linear model         | 0.1205          |
| Quadratic model      | 0.1793          |
| Mobility squared     | 0.4971          |
| Mobility             | 0.6927          |

Table S11: root mean squared error for all "other" estimates for the Netherlands, this is the square root of the mean of the squared differences between the CoMix survey reproduction number and the estimated reproduction number
